# Supplementary material for: Hippocampal glucocorticoid target genes associated with enhancement of memory consolidation
Source: PubMed Central journal article supplement — Eur J Neurosci. 2021 May 6;55(9-10):2666–83. doi: 10.1111/ejn.15226 (PMC9292385; doi:10.1111/ejn.15226), 2021-05-06
Supplement: EJN-55-2666-s001.pdf [file EJN-55-2666-s001.pdf]

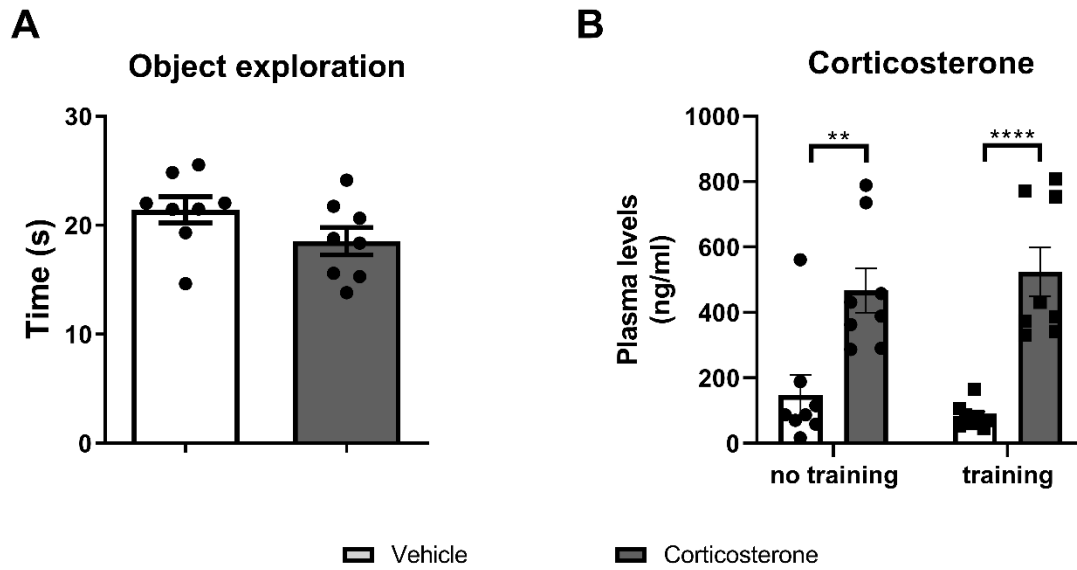

**Supplementary Figure s1.** Object exploration and corticosterone plasma levels in CHIP-seq cohort.

**(A)** Total object exploration time in seconds (s) of two identical objects during the object location memory training trial for training groups (vehicle and 3.0 mg/kg corticosterone, n=8 per group). **(B)** Plasma corticosterone levels at endpoint, 45 minutes after injection (n=8 per group). Data shown as mean  $\pm$  SEM. CHIP = chromatin immunoprecipitation; training = object exploration training; s = seconds; \*\* =  $P < 0.01$ ; \*\*\*\* =  $P < 0.0001$ .

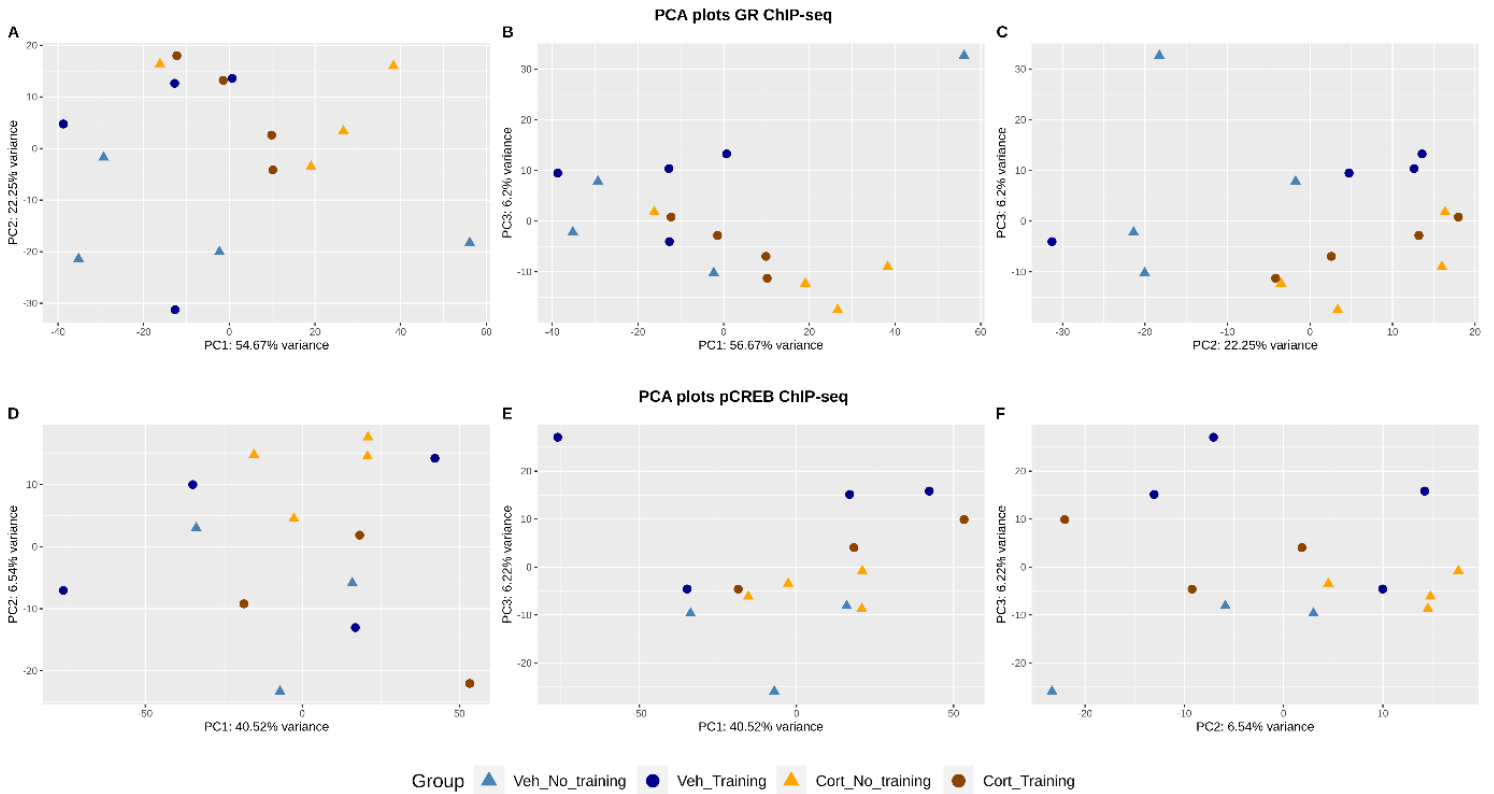

**Supplementary Figure s2.** PCA plots of ChIP-seq data.

PCA plots visualizing the first three principal components of **(A-C)** GR and **(D-F)** pCREB ChIP-seq data. ChIP = chromatin immunoprecipitation; Cort = corticosterone; GR = glucocorticoid receptor; pCREB = phosphorylated cAMP response element-binding protein; PCA = principal component analysis; Training = object exploration training; Veh = vehicle.

## GR binding at known target genes

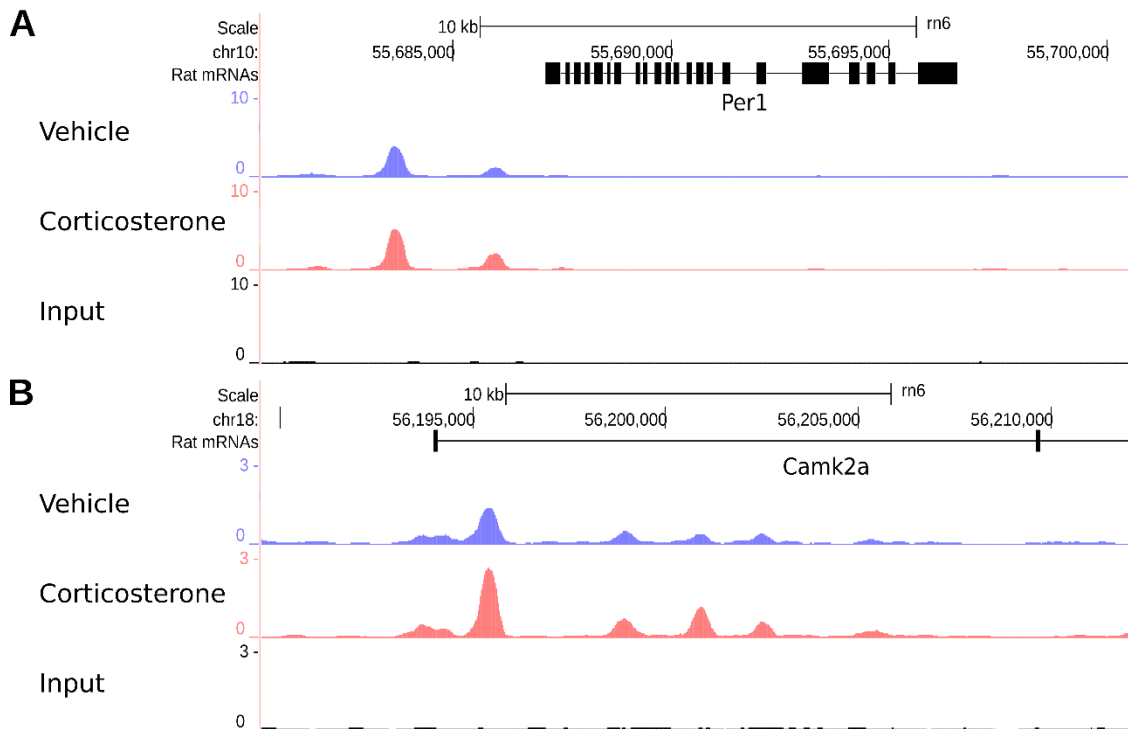

## pCREB binding at known target genes

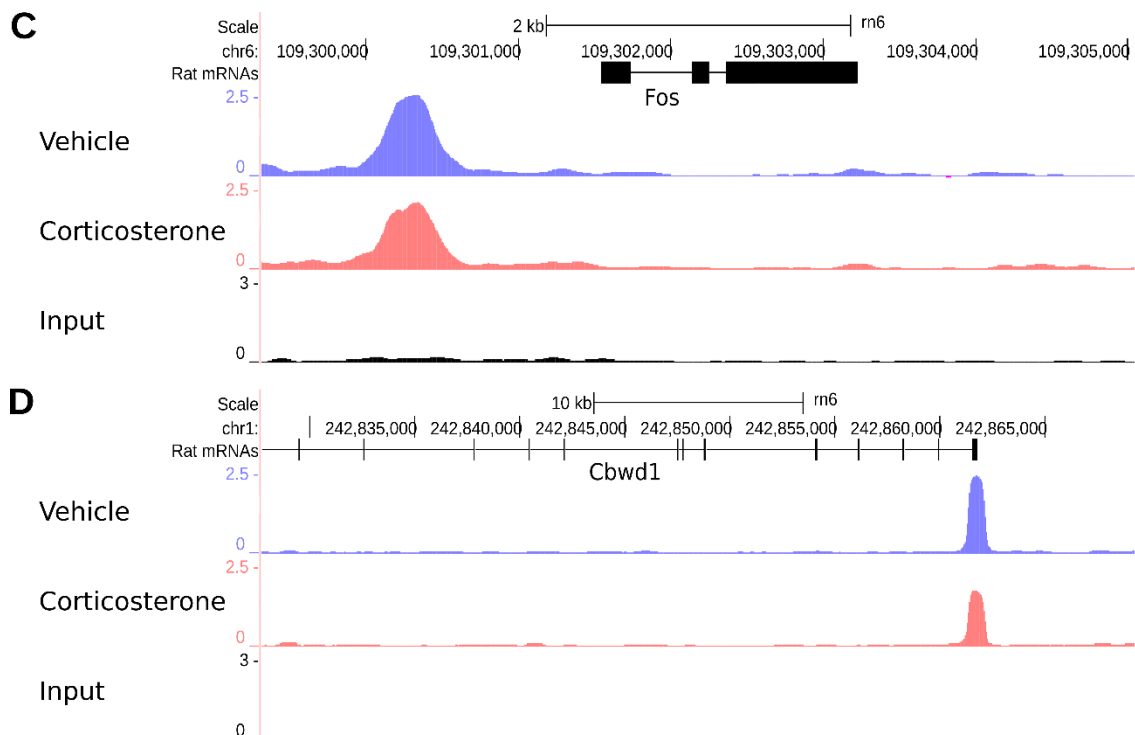

**Supplementary Figure s3.** Validating ChIP-seq signal at known GR and pCREB target genes.

Genomic tracks showing GR and input signal at known GR target genes **(A)** *Per1* and **(B)** *Camk2a* and pCREB and input signal at known pCREB target genes **(C)** *Fos* and **(D)** *Cbwd1*. Displayed ChIP-seq

tracks are overlays of all biological replicates per group: vehicle = blue, corticosterone = red and input = black. CHIP = chromatin immunoprecipitation; GR = glucocorticoid receptor; pCREB = phosphorylated cAMP response element-binding protein.

### Comparison at peak level

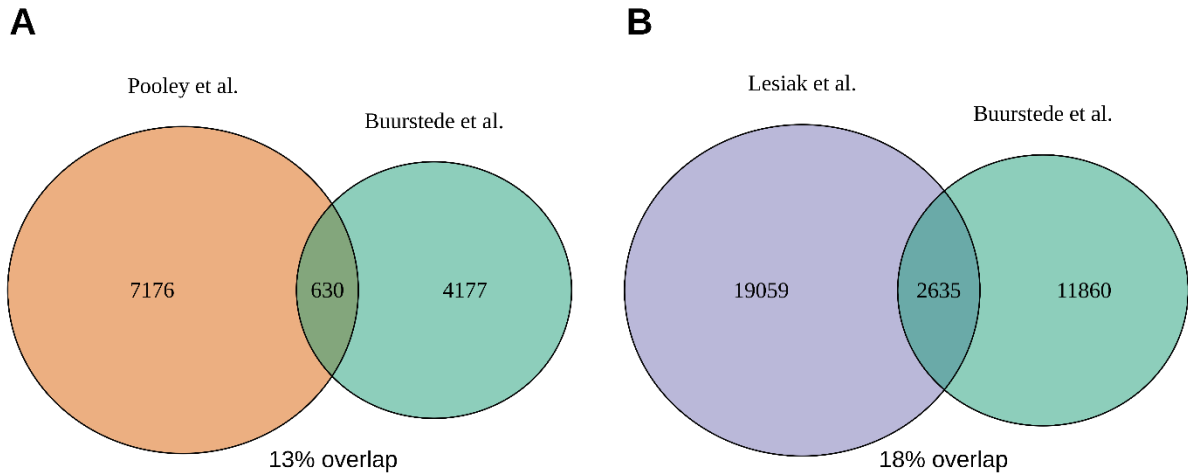

### Comparison at annotated gene level

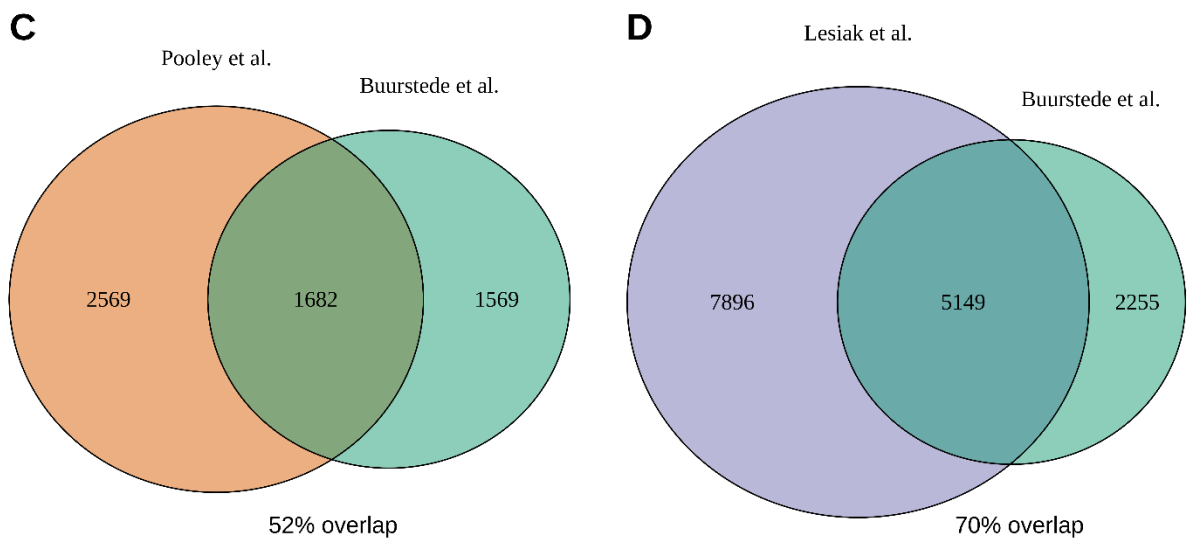

### Supplementary Figure s4. Validation of ChIP-seq data with published datasets of GR and pCREB.

Our GR and pCREB ChIP-seq data were compared to publicly available GR ChIP-seq data by Pooley et al. and pCREB ChIP-seq data by Lesiak et al. at **(A & B)** a peak level and at **(C & D)** an annotated gene level. Numbers in venn diagrams indicate the amount of identified **(A & B)** binding sites or **(C & D)** unique genes associated to these binding sites. Percentages below venn diagrams indicate the amount of our data that overlaps with the reference dataset. ChIP = chromatin immunoprecipitation; GR = glucocorticoid receptor; pCREB = phosphorylated cAMP response element-binding protein.

**A****GR binding sites called specific without training**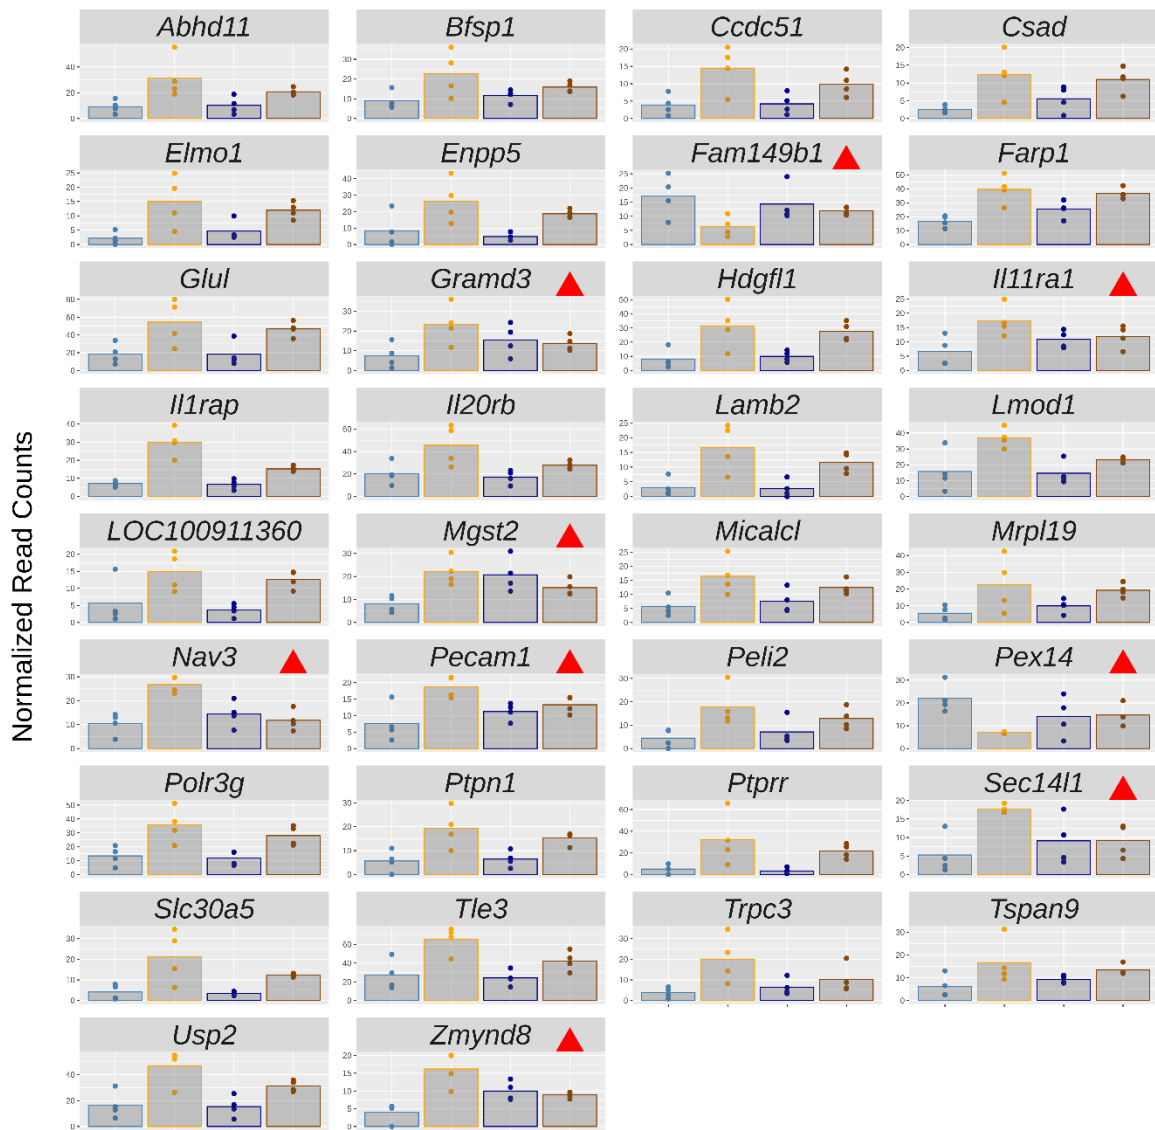**B****GR binding sites called specific with training**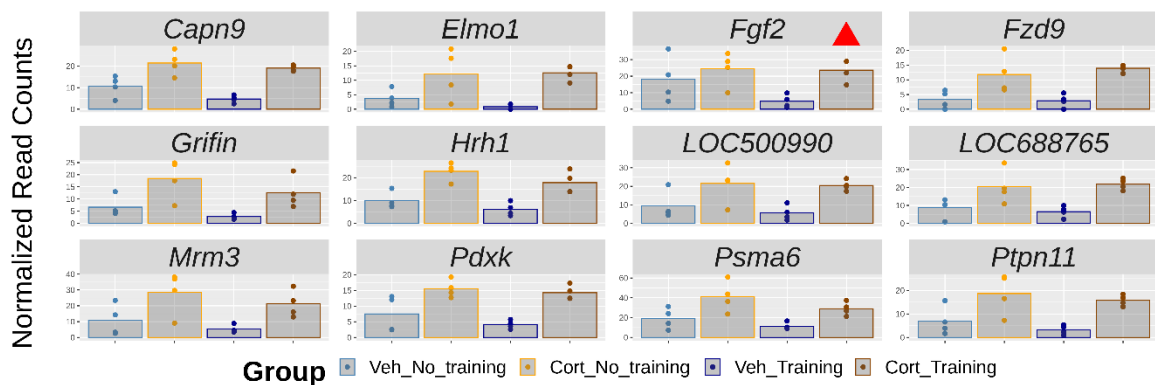

Supplementary Figure s5. Overview of “context-specific GR DNA-binding”

Normalized read count plots of GR DNA-binding sites with context-specificity. Differential GR DNA-binding was detected specifically **(A)** after corticosterone in untrained animals or **(B)** after corticosterone in trained animals. Red triangles behind the name of the gene associated to the binding site indicates that significance was lost in the pooled analysis. Cort = corticosterone; GR = glucocorticoid receptor; Training = object exploration training; Veh = vehicle.

**A**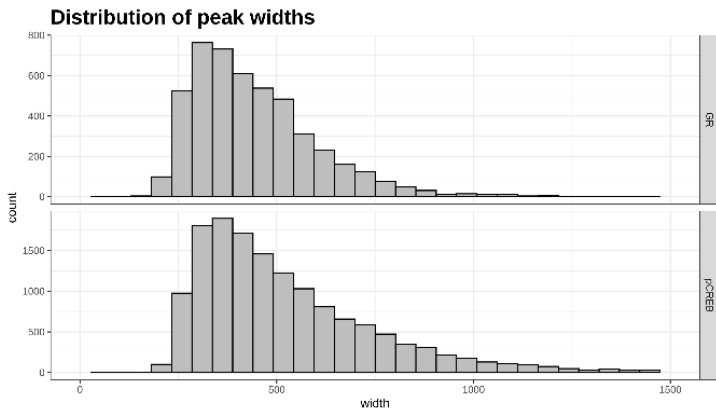**B**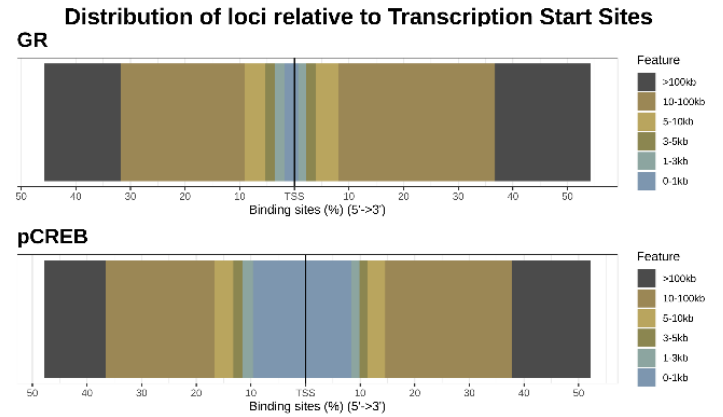**C**

**Annotation GR binding sites overlapping pCREB**  
Total loci: 3923

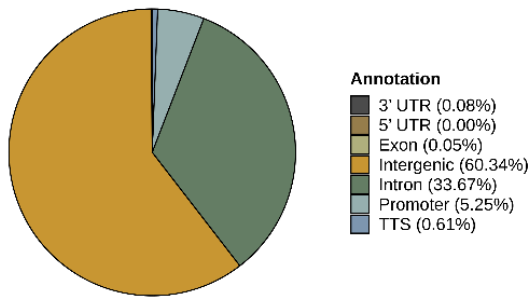**D**

**Annotation GR binding sites non\_overlapping pCREB**  
Total loci: 865

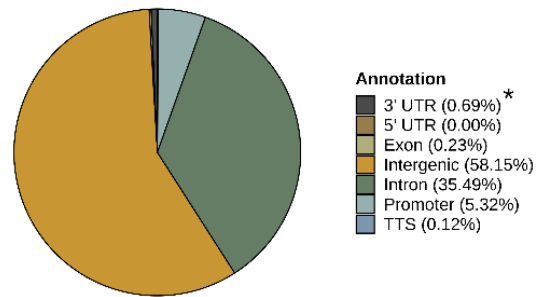

**Supplementary Figure s6. GR and pCREB peak width and genomic distribution**

**(A)** Distribution of GR and pCREB peaks widths, with the abundance displayed as count on the y-axis. **(B)** Distance to transcription start sites plot for all GR and pCREB binding sites. Annotation and distribution of GR binding sites that **(C)** do and **(D)** do not overlap with pCREB peaks. GR binding was significantly increased in the 3'UTR region in absence of pCREB co-binding. GR = glucocorticoid receptor; pCREB = phosphorylated cAMP response element-binding protein; TSS = transcription start site; TTS = transcription termination site; UTR = untranslated region; \* = Bonferroni corrected  $P < 0.05$ .



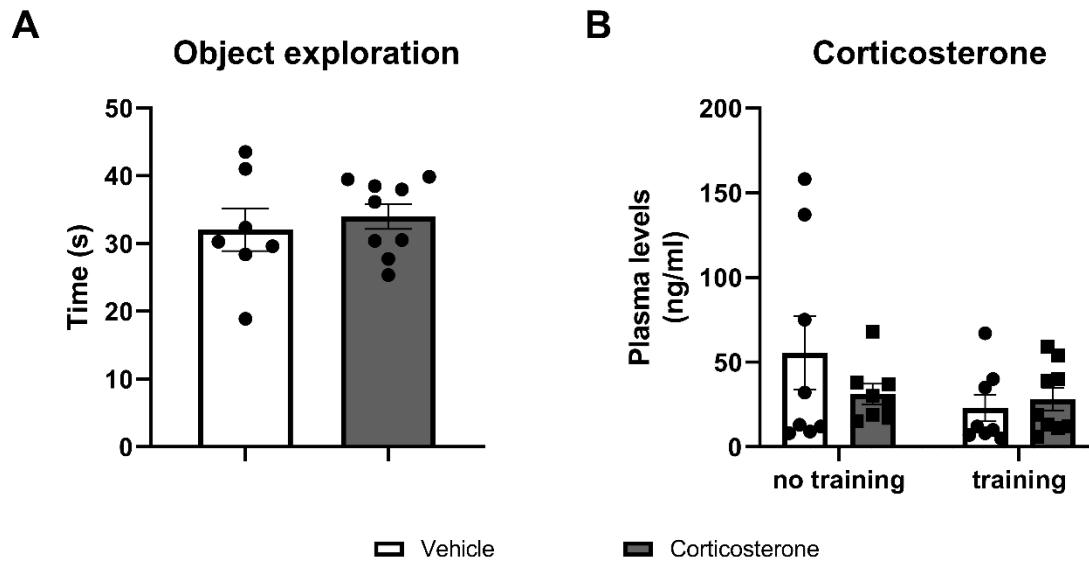

**Supplementary Figure s7.** Object exploration and corticosterone plasma levels in RNA-seq cohort.

**(A)** Total object exploration time in seconds (s) of two identical objects during the object location memory training trial for training groups (vehicle and 3.0 mg/kg corticosterone, n=7-9 per group).

**(B)** Plasma corticosterone levels at endpoint, three hours after injection (n=8-9 per group). Data shown as mean ± SEM. training = object exploration training; s = seconds.

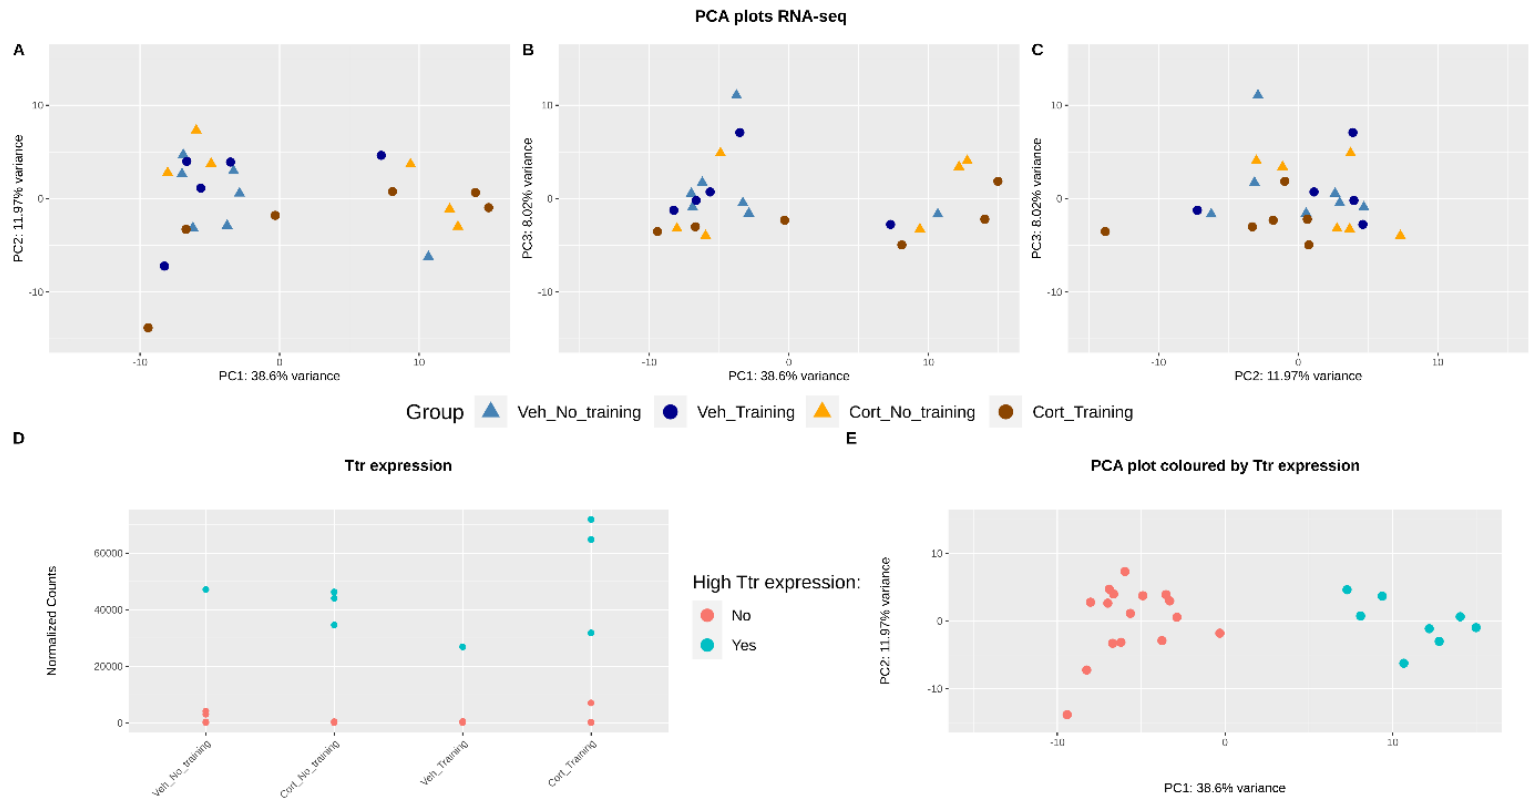

**Supplementary Figure s8.** PCA plots of RNA-seq data.

**(A-C)** PCA plots visualizing the first three principal components of the transcriptome data. **(D)** Expression plot with normalized counts of choroid plexus marker gene *Ttr* in the hippocampal samples, indicating a degree of tissue contamination. **(E)** PCA plot coloured according to high or low *Ttr* expression levels in the samples, explaining observed clustering in PCA plots. Cort = corticosterone; PCA = principal component analysis; Training = object exploration training; Veh = vehicle.

**A****Differentially expressed specifically without training - lost in pooled analysis**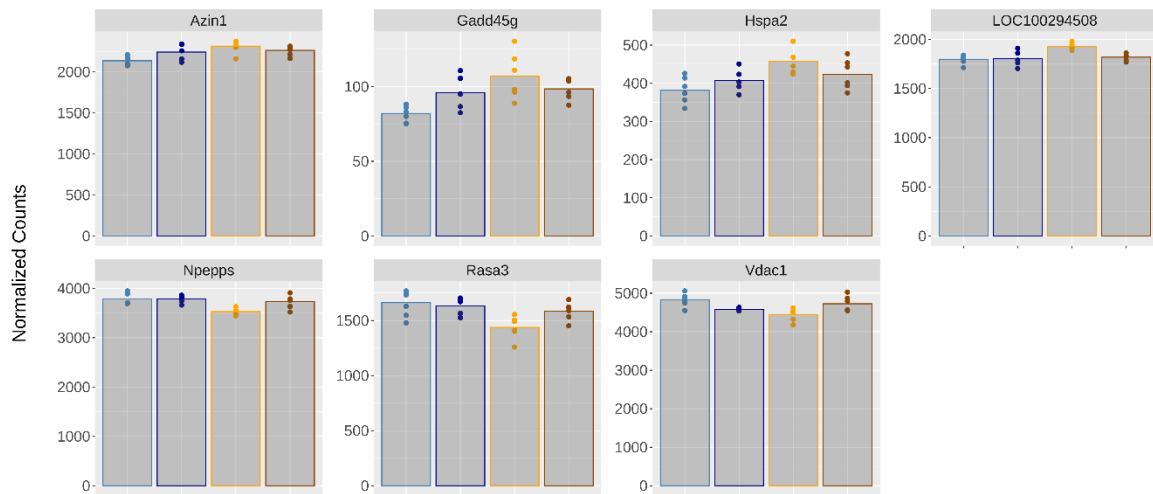**B****Differentially expressed specifically with training - lost in pooled analysis**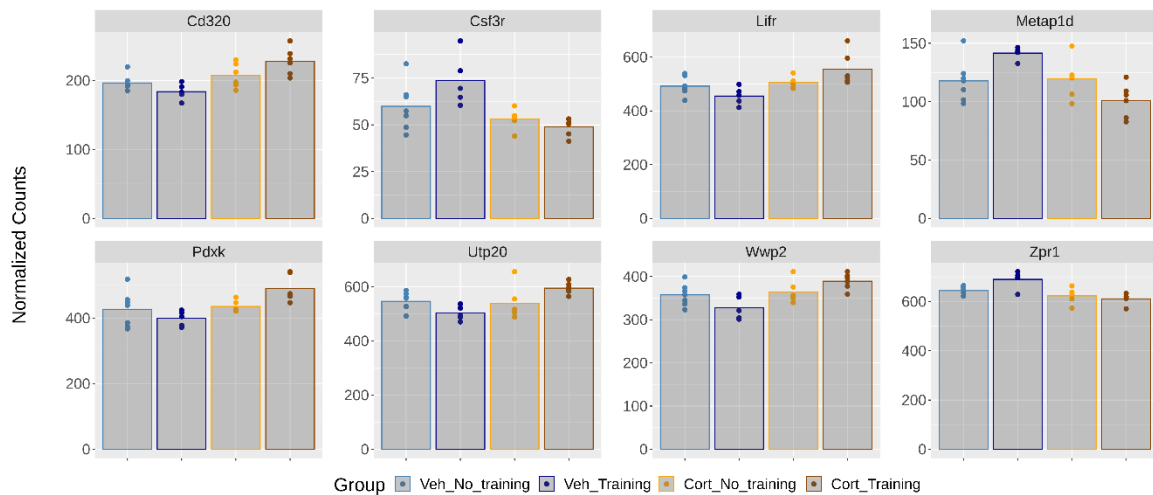**Supplementary Figure s9.** Overview of lost “context-specific” transcriptome changes.

Normalized count expression plots of genes differentially expressed **(A)** without trained or **(B)** with training that were lost in the pooled transcriptome analysis. Cort = corticosterone; Training = object exploration training; Veh = Vehicle.

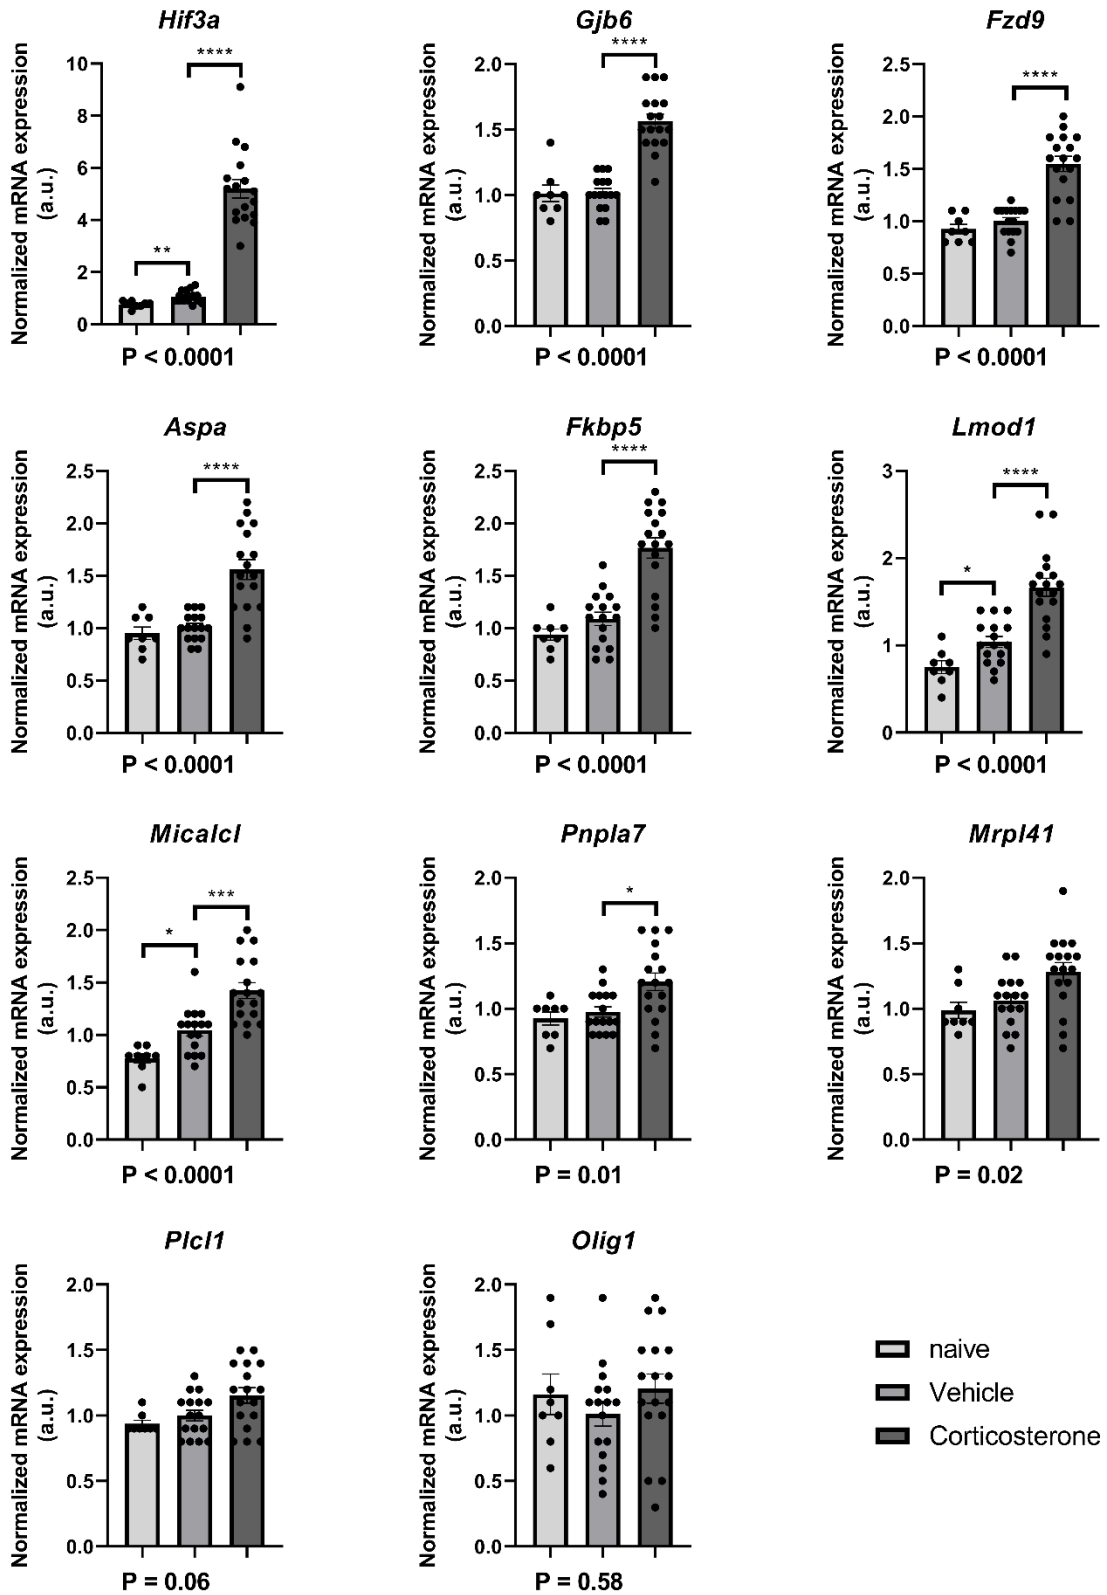

**Supplementary Figure s10.** qPCR validation of transcriptional effects of a set of GR-associated target genes.

mRNA expression of a set of identified GR target genes selected based on transcriptome data and associated differential GR DNA-binding (n=8 for naïve group and 16-17 for treated groups). Data shown as mean  $\pm$  SEM, p-value of one-way ANOVA is displayed below the graphs. \* = P<0.05, \*\*\* P<0.001, \*\*\*\* P<0.0001.
